# Supplementary material for: Facile synthesis of novel hydrophilic and carboxyl-amine functionalized superparamagnetic iron oxide nanoparticles for biomedical applications
Source: Royal Society of Chemistry journal article supplement (doi:10.1039/c6ra18567c), 2016-01-01
Supplement: c6ra18567c1.pdf [file c6ra18567c1.pdf]

## Supporting Information

### **FACILE SYNTHESIS OF NOVEL HYDROPHILIC AND CARBOXYL-AMINE FUNCTIONALIZED SUPERPARAMAGNETIC IRON OXIDE NANOPARTICLES FOR BIOMEDICAL APPLICATIONS**

Ganeshlenin Kandasamy <sup>1</sup>, Sreeraj Surendran <sup>2</sup>, Anindita Chakrabarty <sup>2</sup>, S. N. Kale <sup>3</sup>,

Dipak Maity <sup>1\*</sup>

<sup>1</sup>*Department of Mechanical Engineering, Shiv Nadar University, Uttar Pradesh 201314, India*

<sup>2</sup>*Department of Life sciences, Shiv Nadar University, Uttar Pradesh 201314, India*

<sup>3</sup>*Department of Applied Physics, Defence Institute of Advanced Technology, Pune 411025, India*

\* Corresponding author: [dipak.maity@snu.edu.in](mailto:dipak.maity@snu.edu.in)

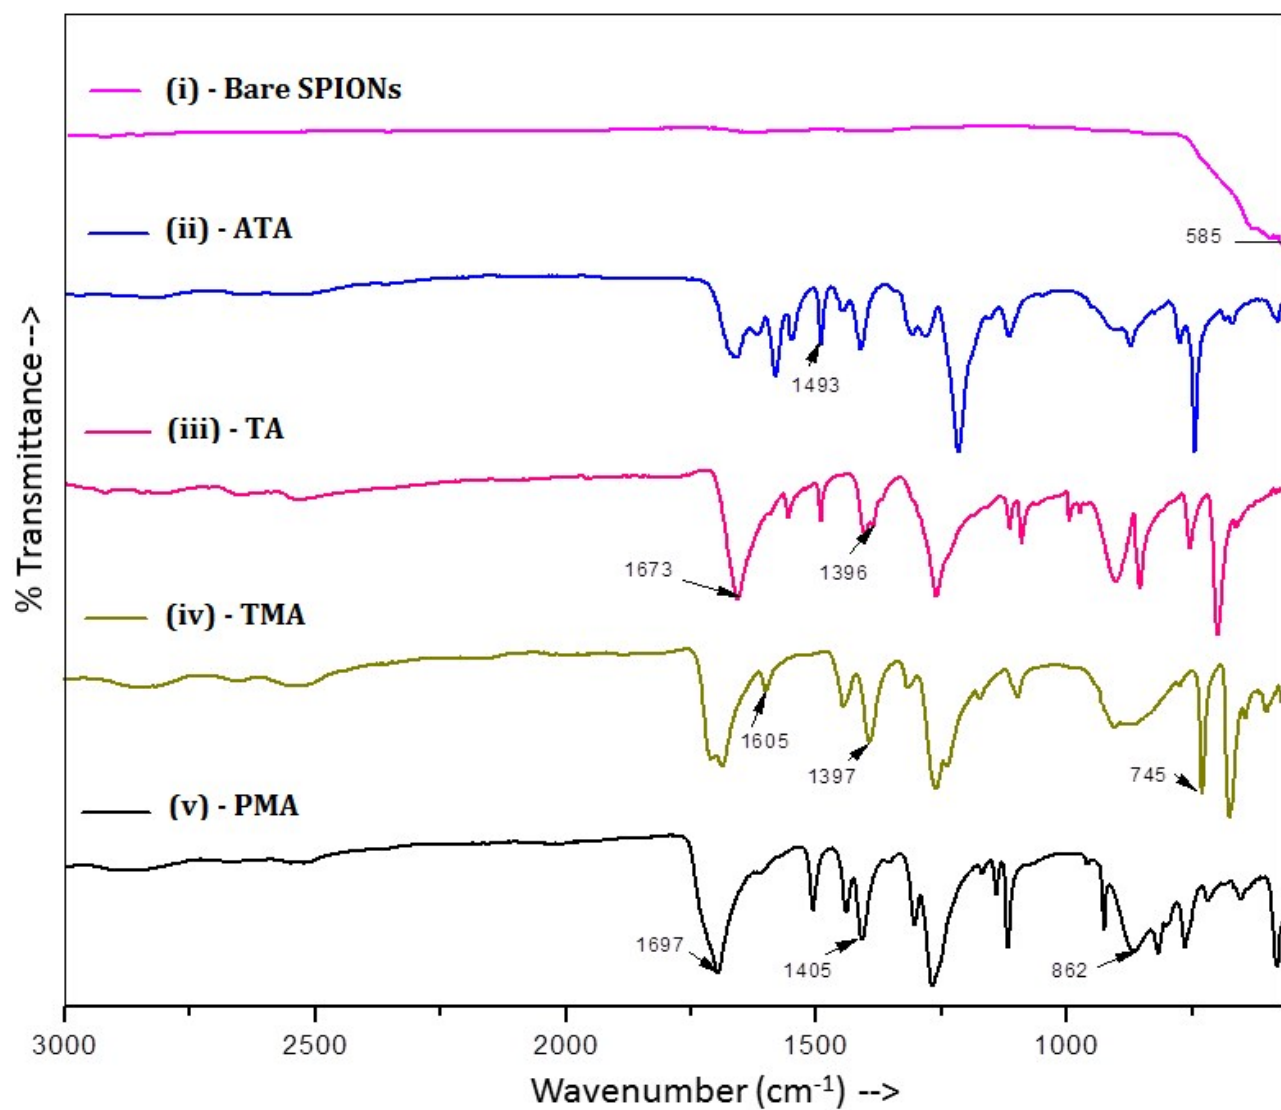

30 **Fig. S1.** FTIR spectra of (i) bare SPIONs, (ii) ATA, (iii) TA, (iv) TMA and (v) PMA molecules  
 31 respectively.

32
